# Supplementary material
Source: PubMed Central journal article supplement (PMC2217651)
Supplement: plntcell_tpc.107.053827_1.pdf [file plntcell_tpc.107.053827_1.pdf]

# Supplemental Data. van Poecke et al. Natural Variation in *RPS2*-Mediated Resistance Among *Arabidopsis* Accessions: Correlation Between Gene Expression Profiles and Phenotypic Responses.

Supplemental Figure 1. Geographic origins of the *Arabidopsis* accessions used are indicated on the world map. In the inset, the altitudes of the origins are indicated.

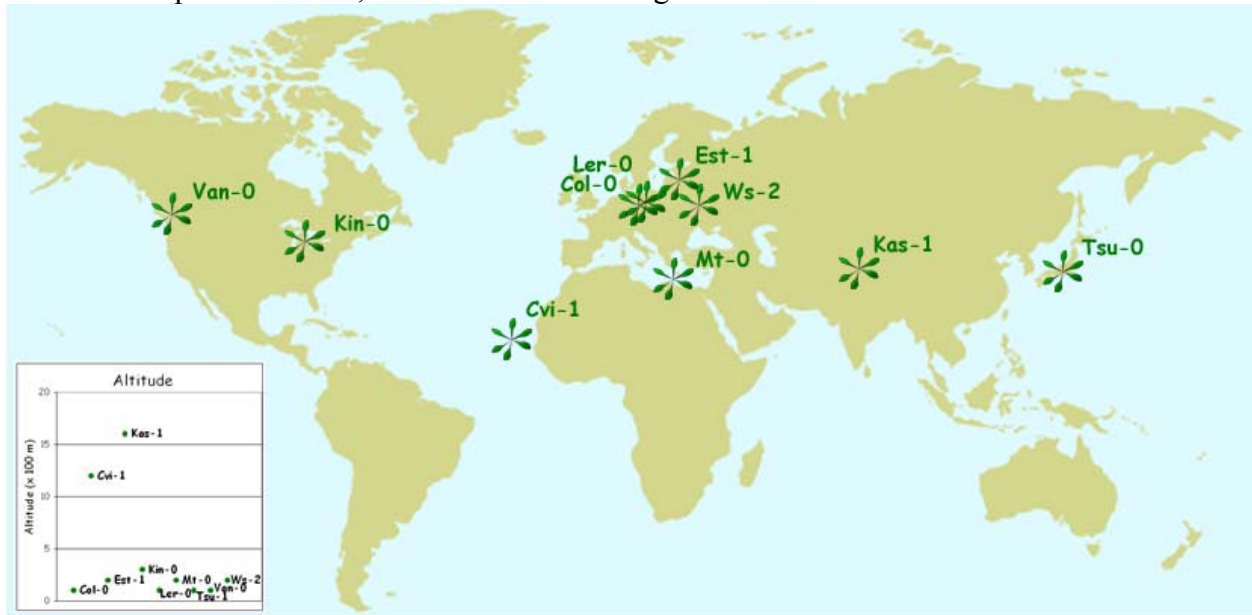

Supplemental Figure 2. Conductivity for all plant genotypes. Each panel corresponds to one of the genotypes, as indicated. The leaf disks were infected with either *Pst avrRpt2* (*avrRpt2*<sup>+</sup>, black) or *Pst* (*avrRpt2*<sup>-</sup>, red). The fitted conductivity value time course using a mixed linear model described in METHODS is plotted. The dotted curves above and below the solid or dashed curves indicate the 95% confidence interval.

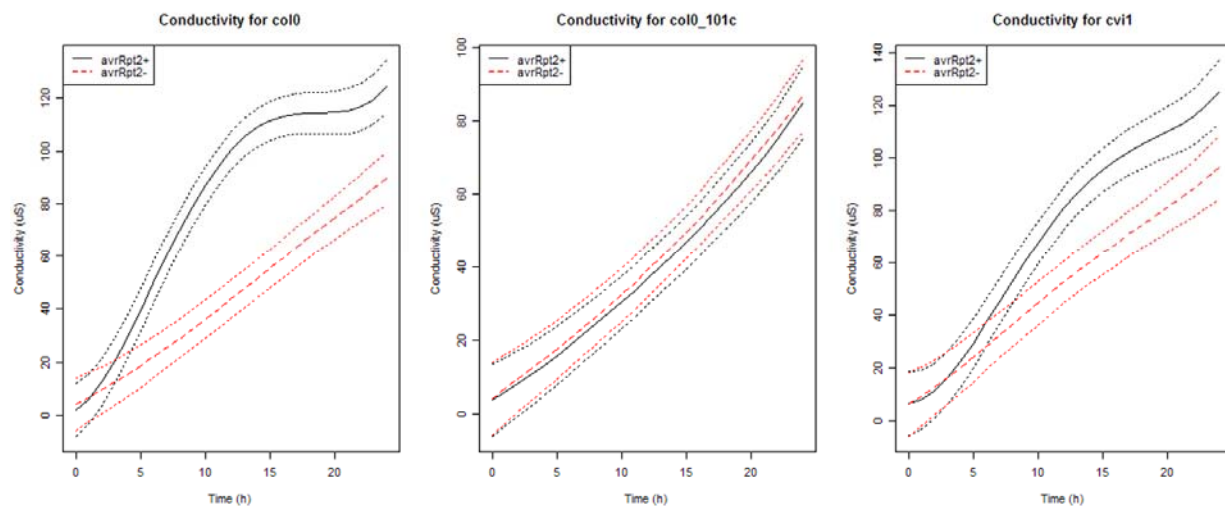

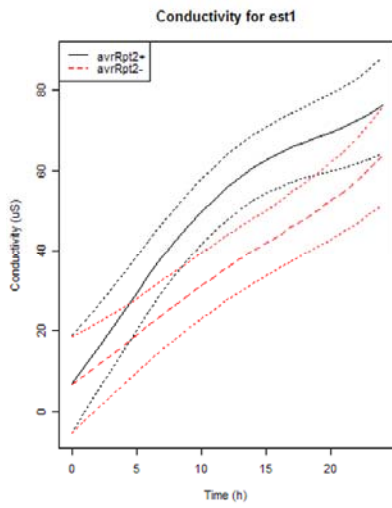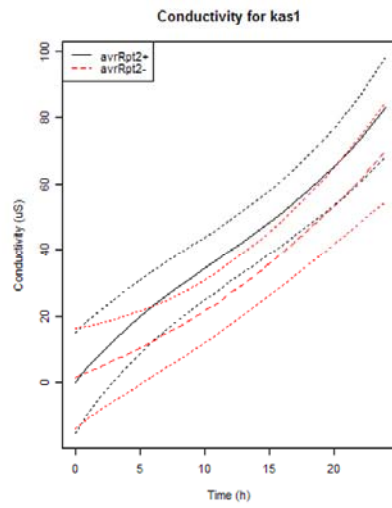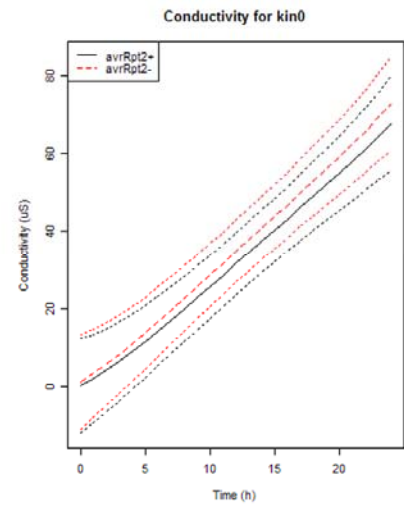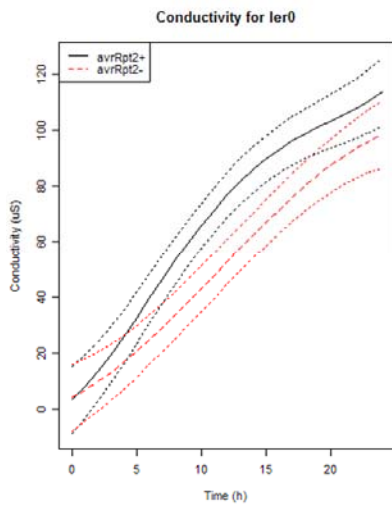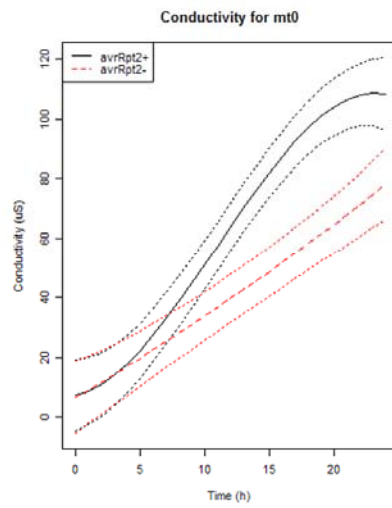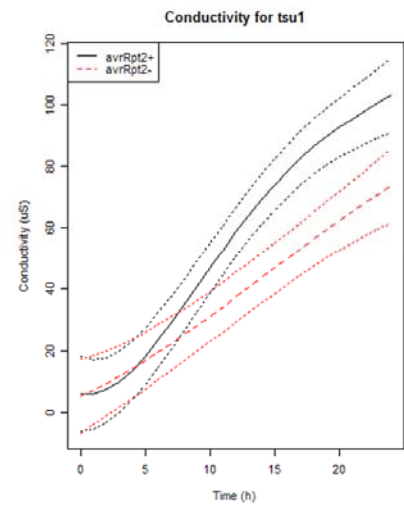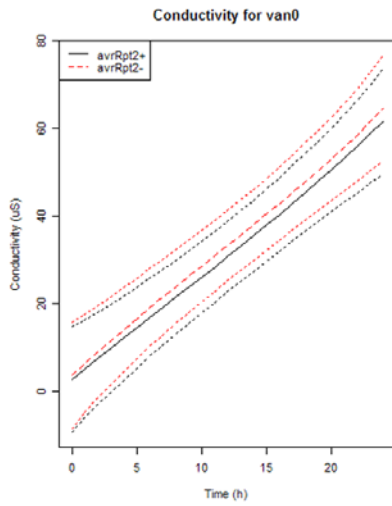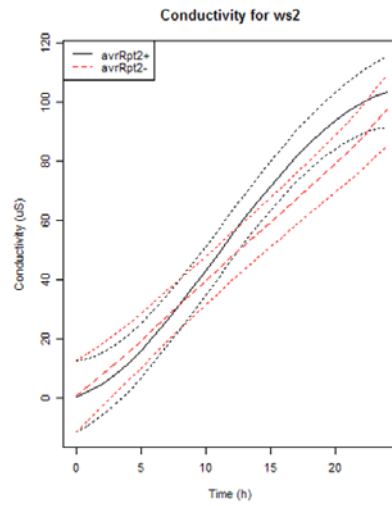

Supplemental Figure 3.  $\Delta$ Conductivity for all plant genotypes. Each panel corresponds to one of the genotypes, as indicated. The fitted time course of the difference between the conductivities with *Pst avrRpt2*- and *Pst*-infected leaf disks ( $\Delta$ Conductivity) is plotted as a solid curve. The dotted curves above and below the solid curve indicate the 95% confidence interval.

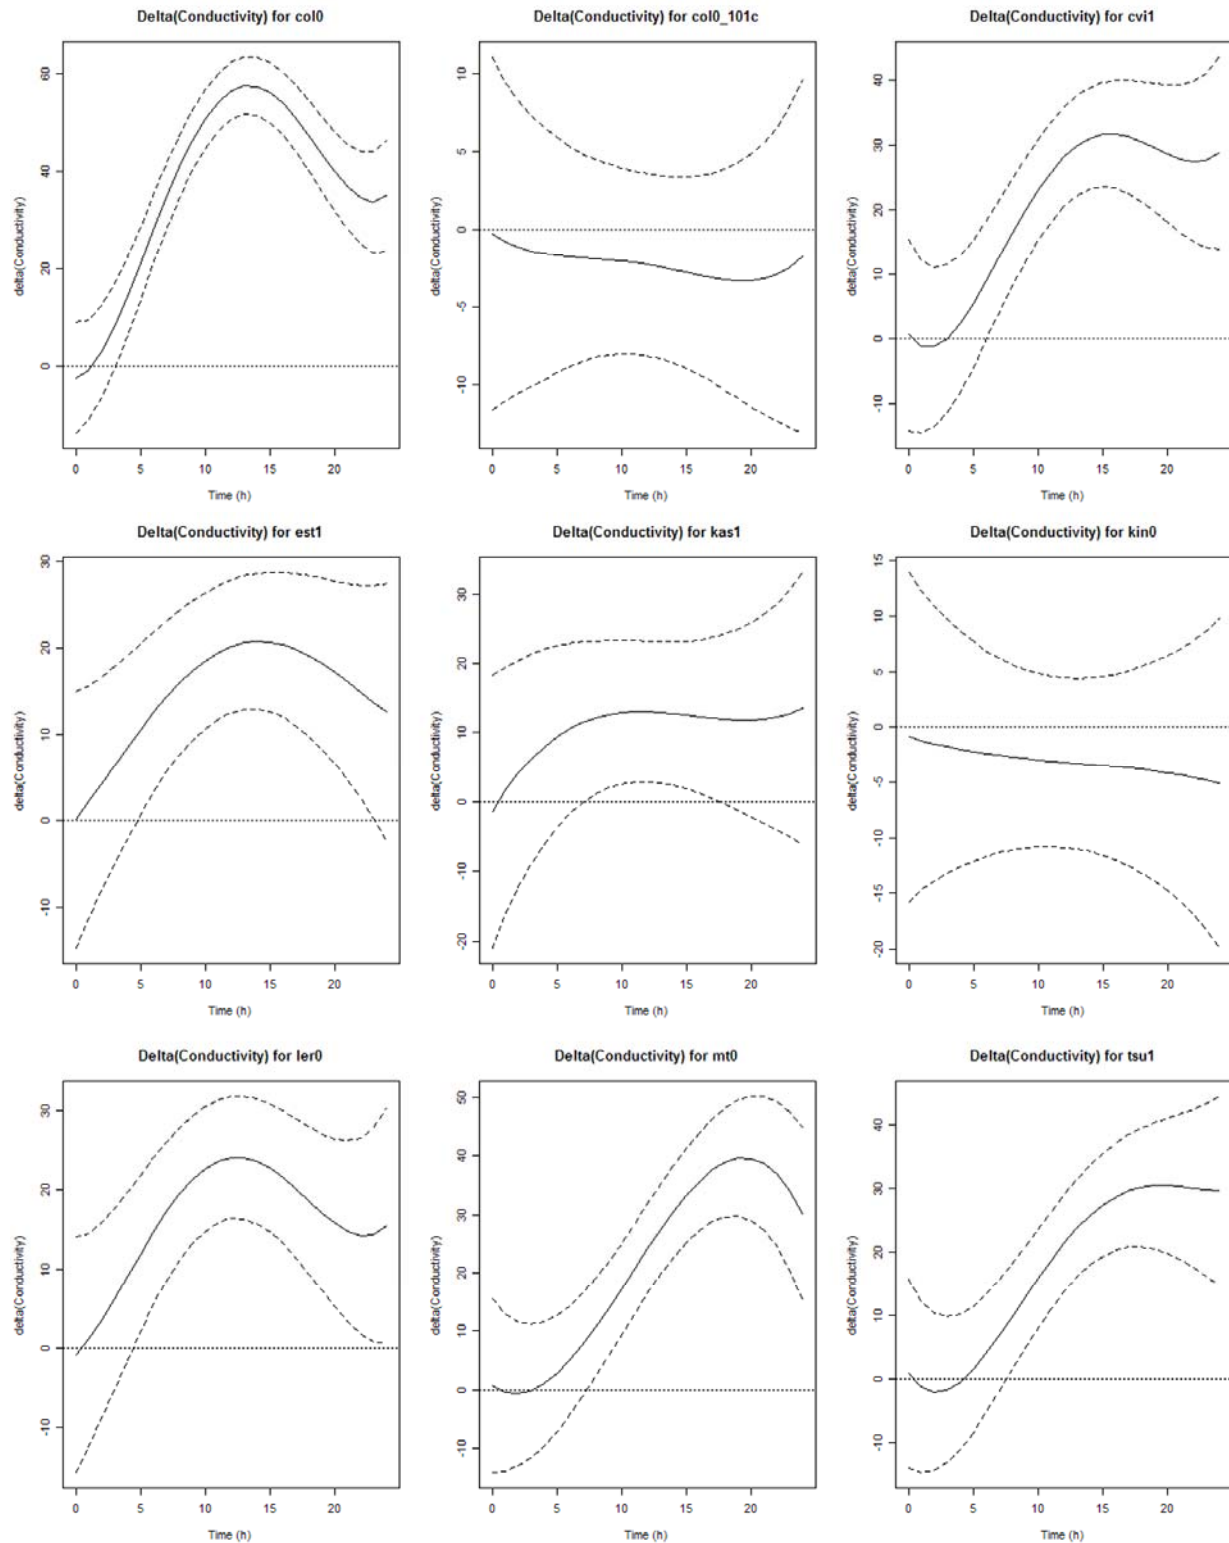

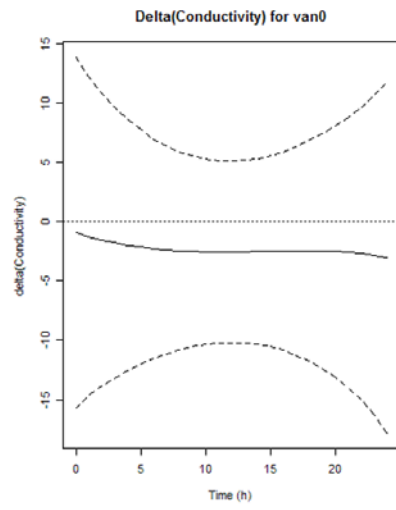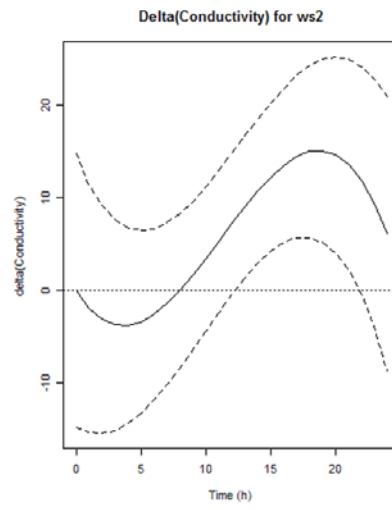

Supplemental Figure 4.  $\Delta\Delta$ Conductivity for all pair-wise comparisons among all plant genotypes. Each panel corresponds to one of the pair-wise genotype comparisons, as indicated. The fitted time course of the difference in the  $\Delta$ Conductivity between two genotypes is plotted as a solid curve. The dotted curves above and below the solid curve indicate the 95% confidence interval.

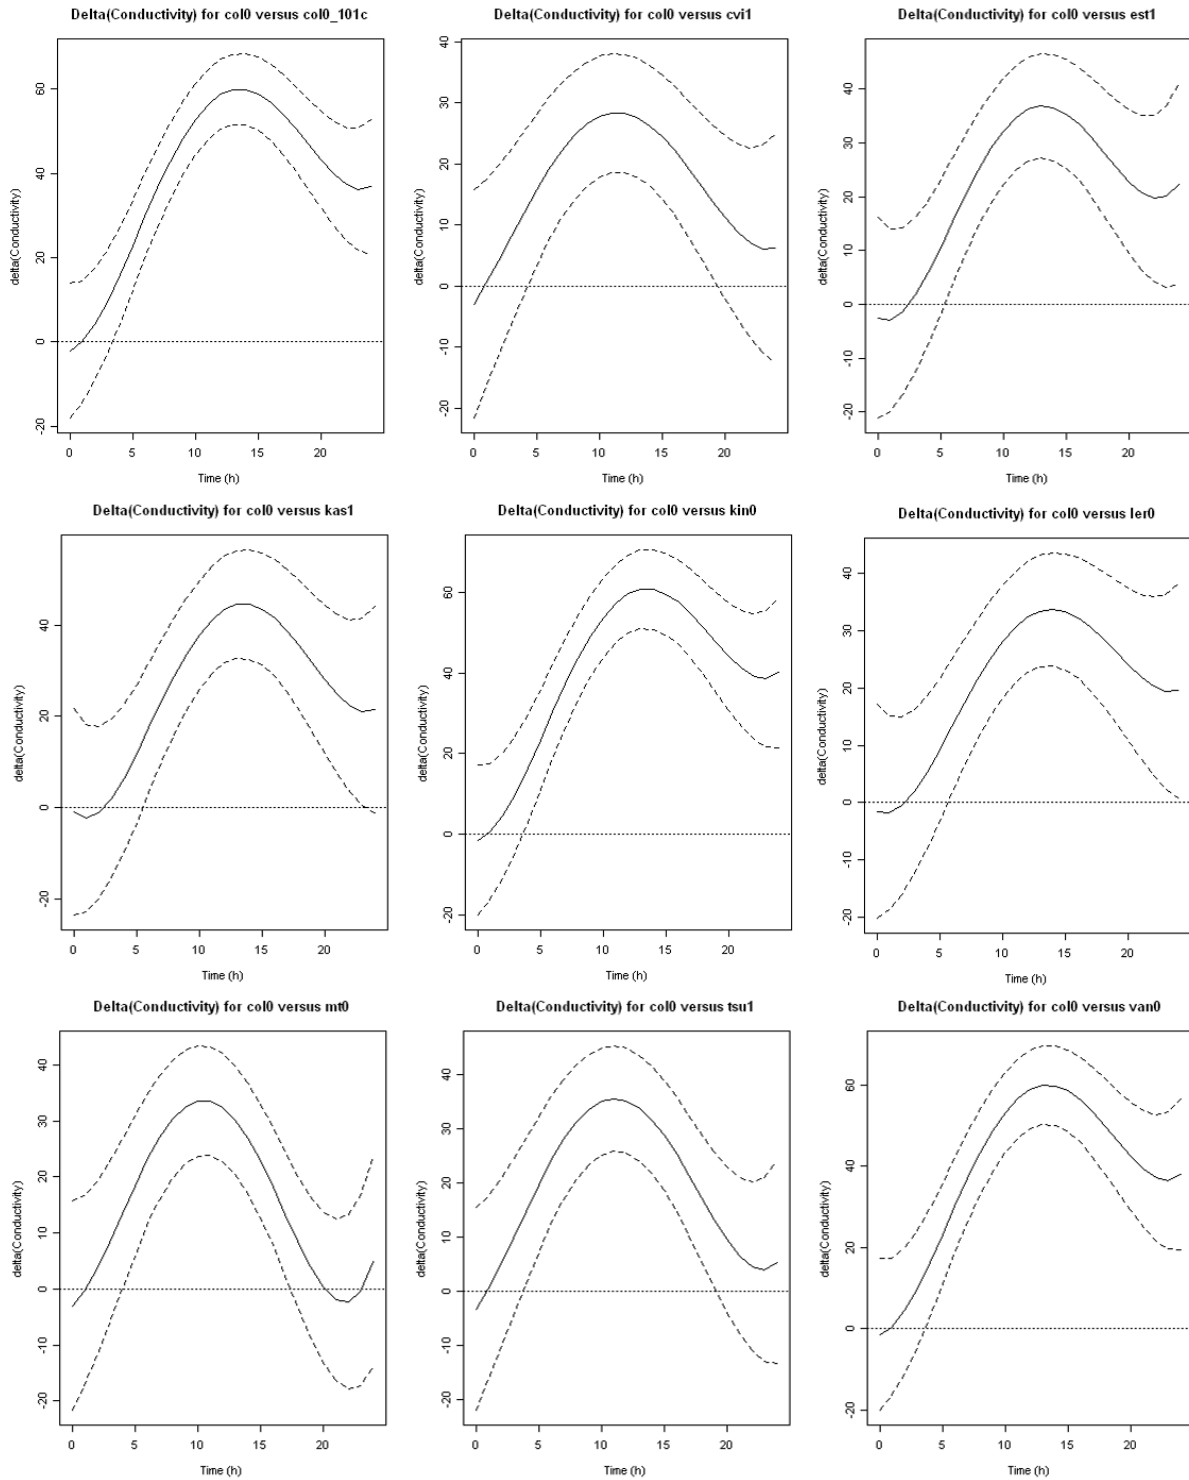

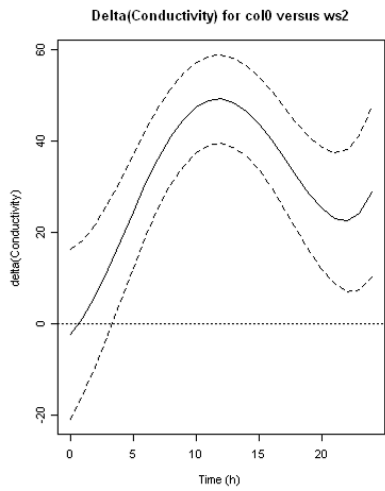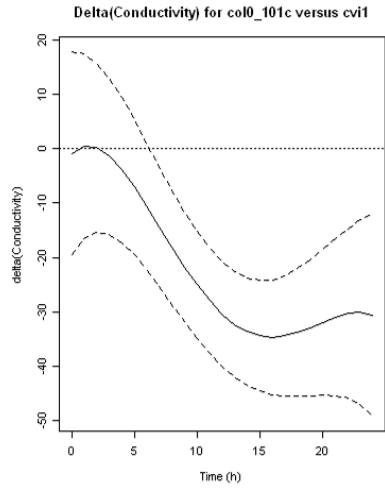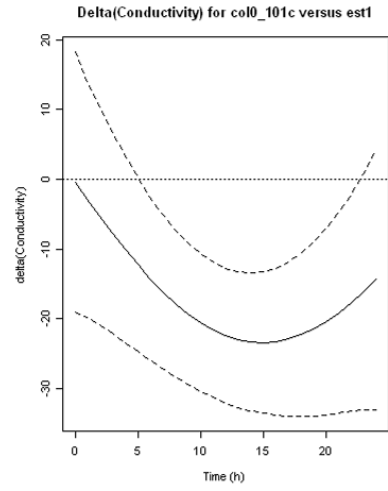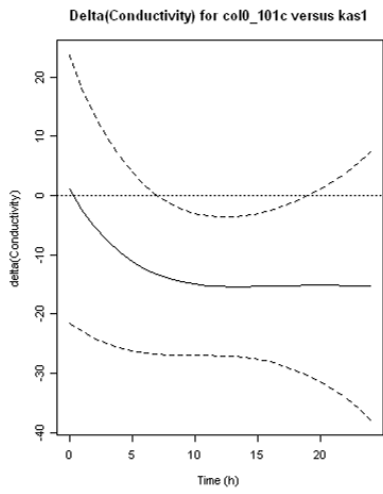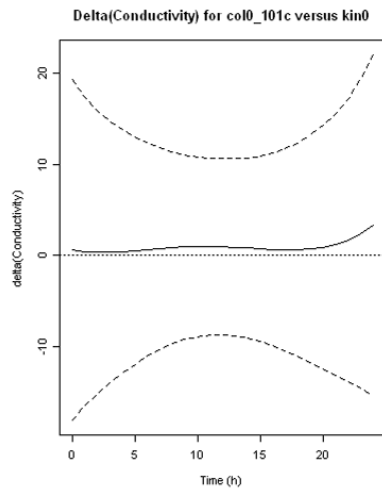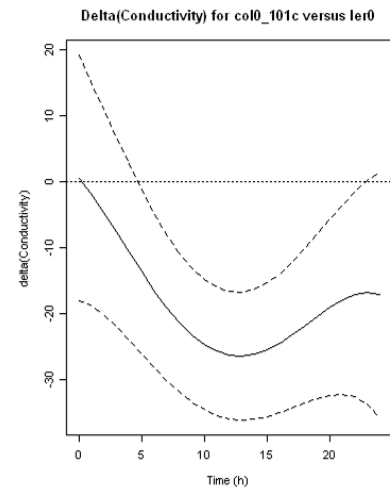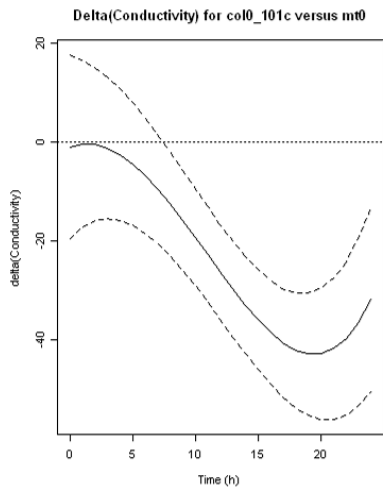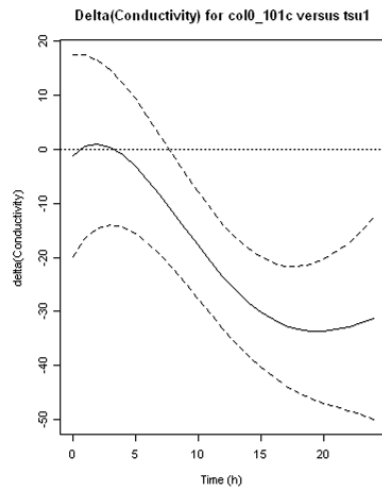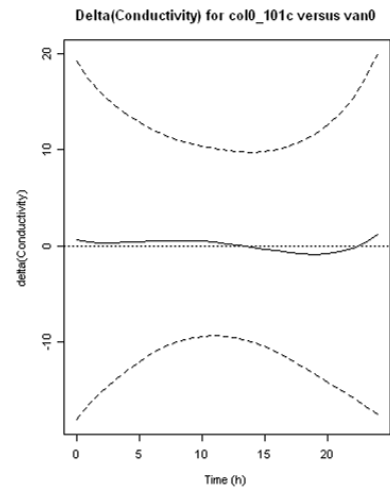

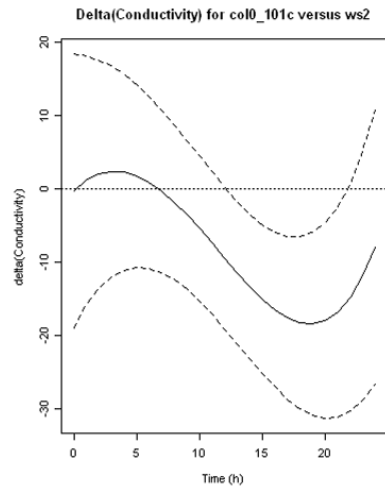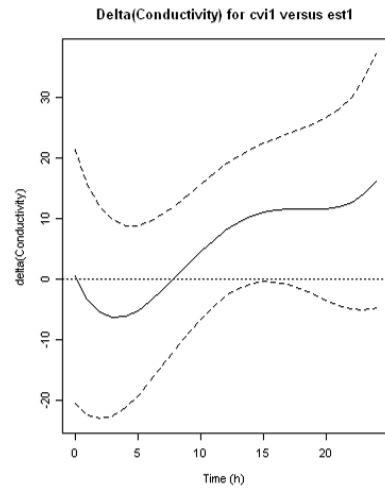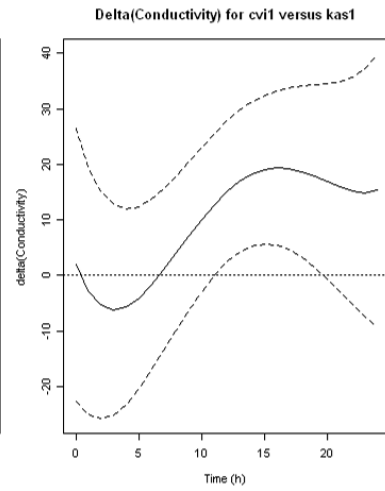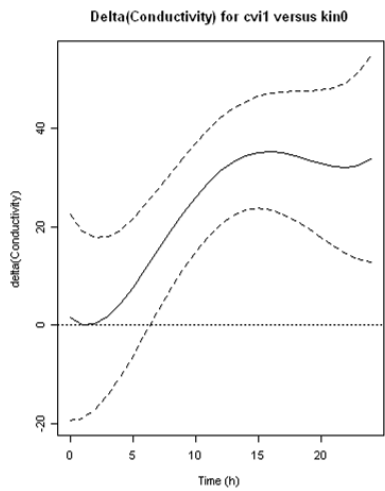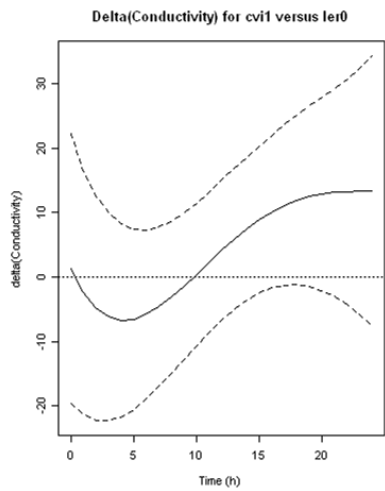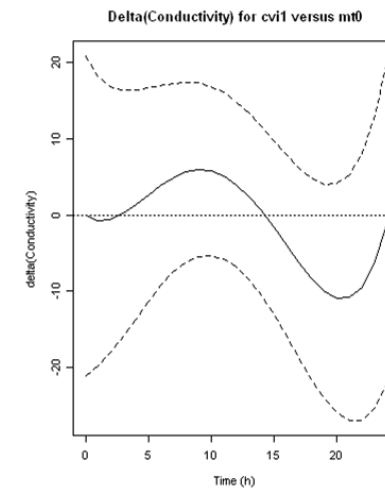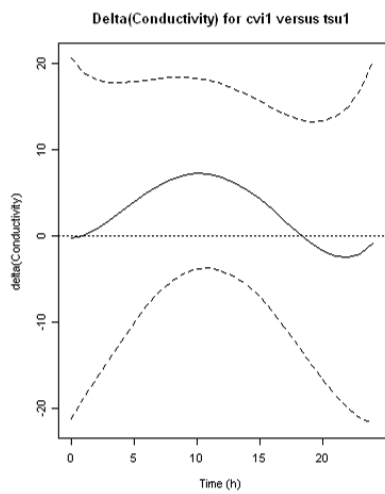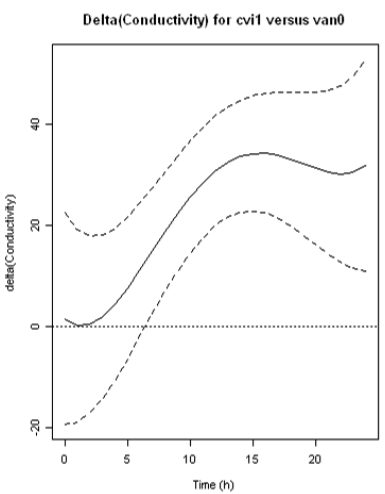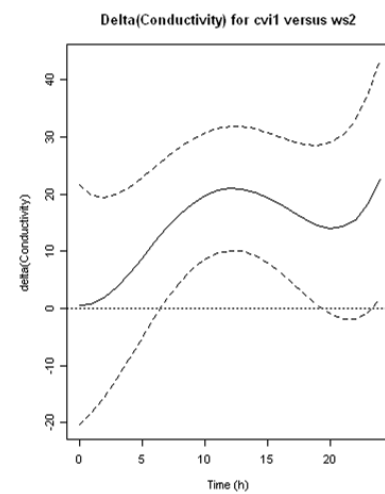

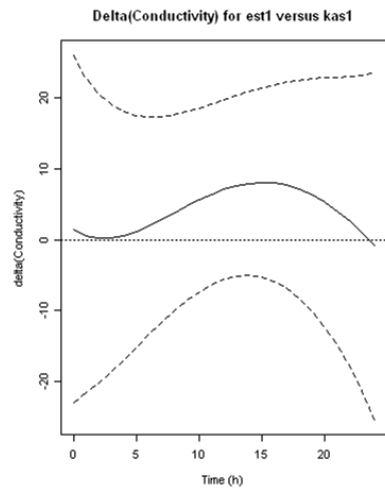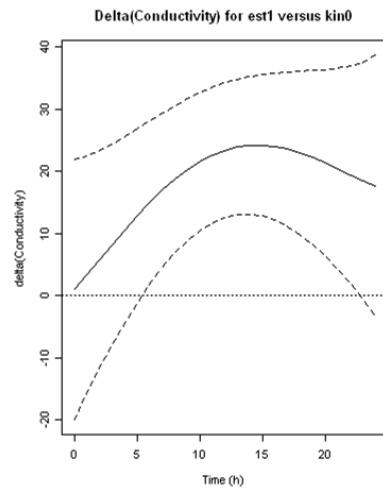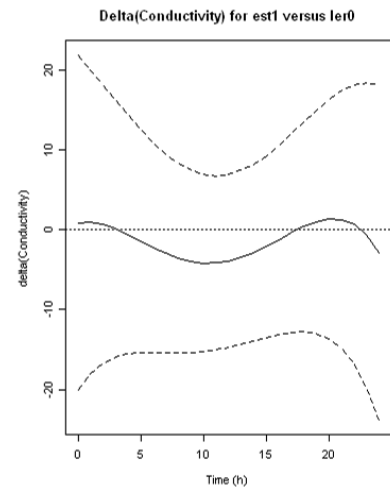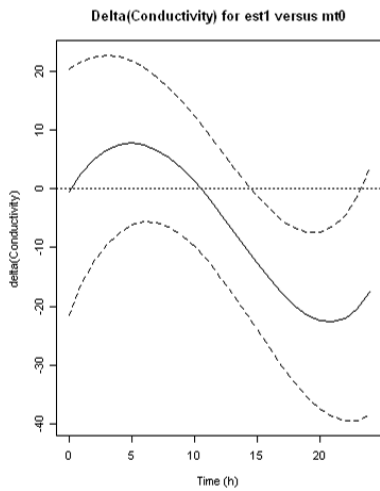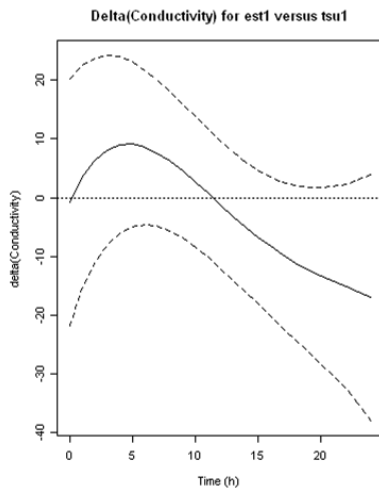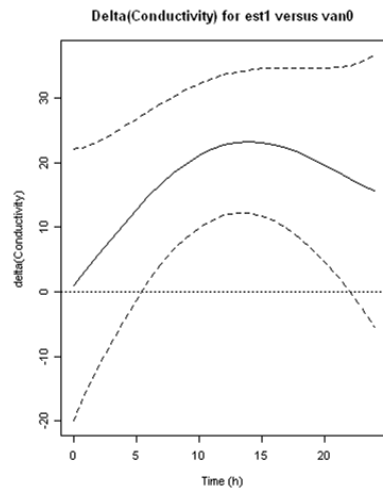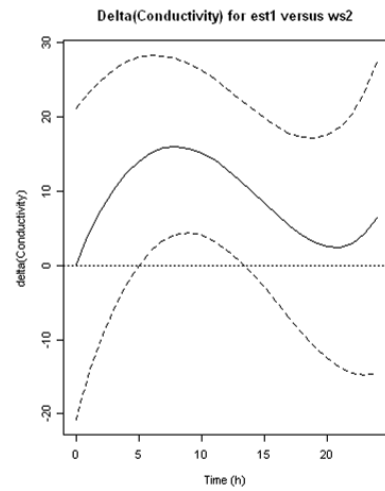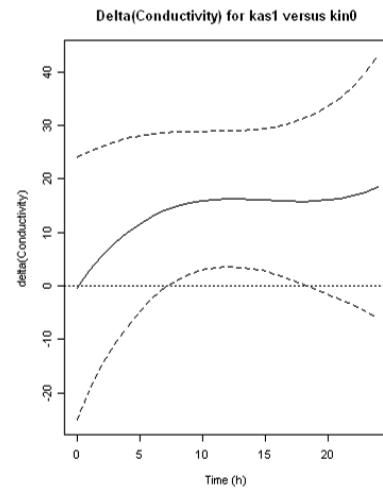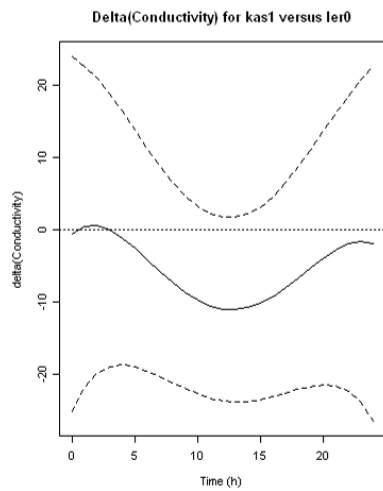



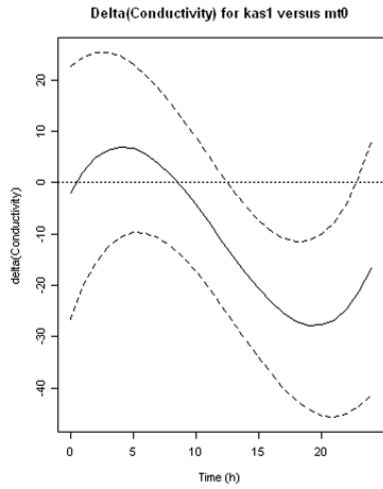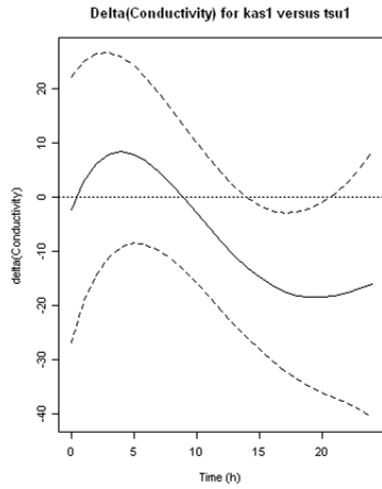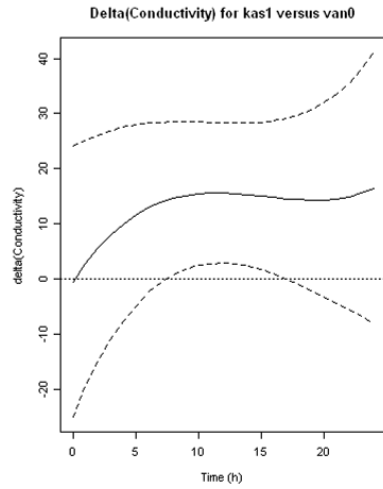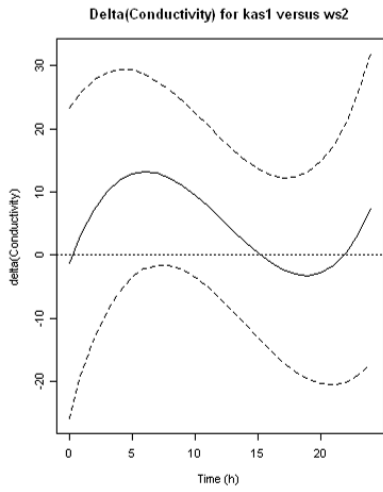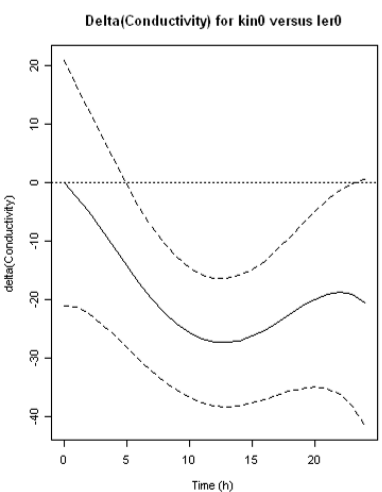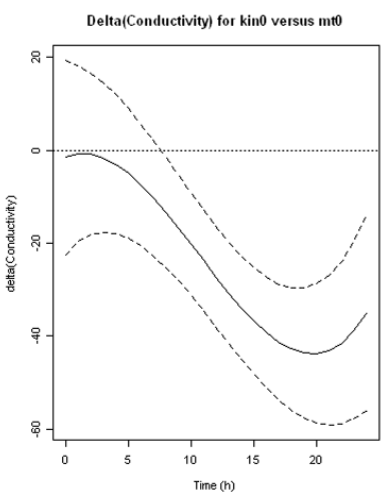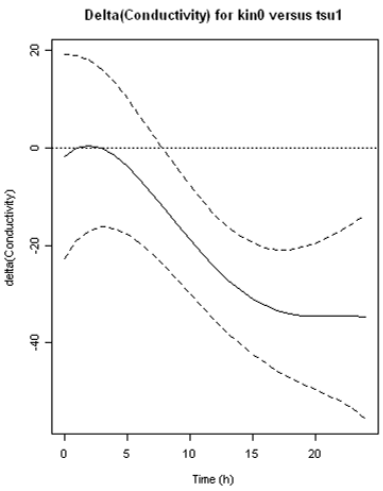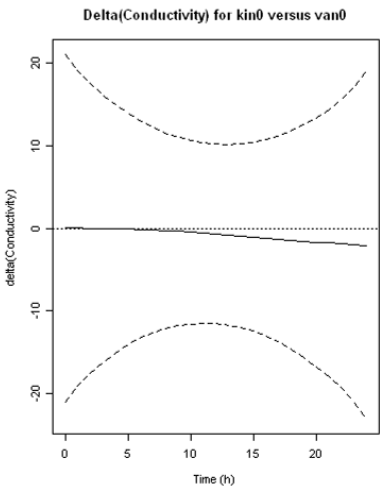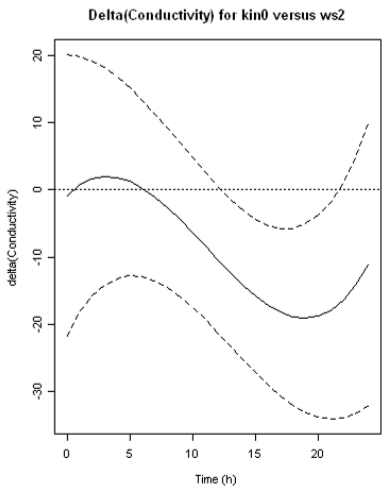

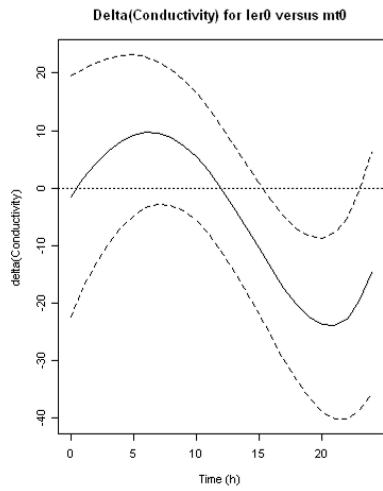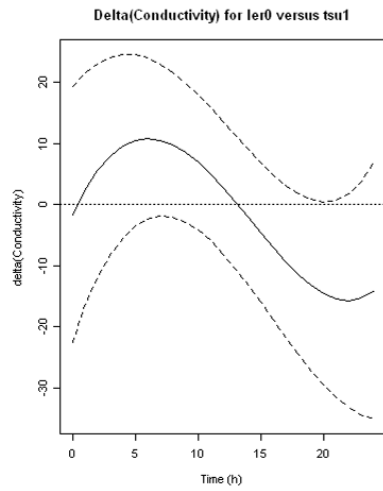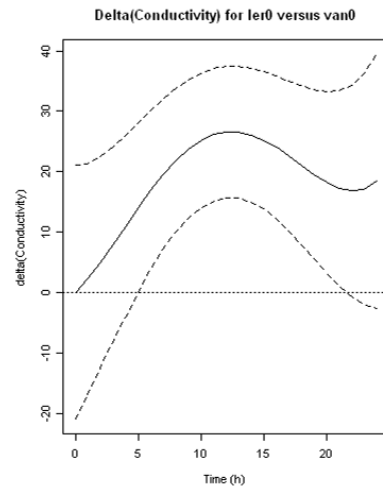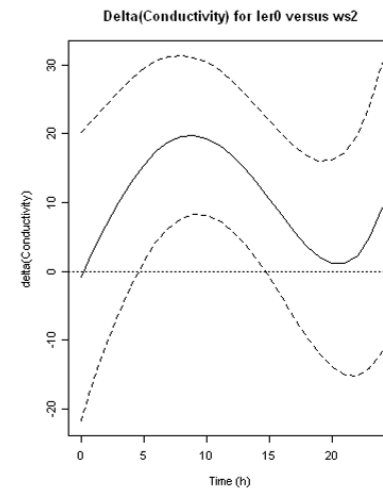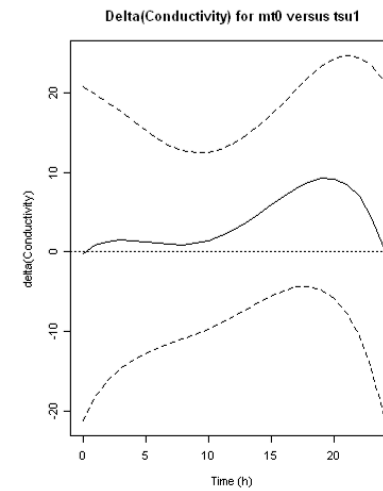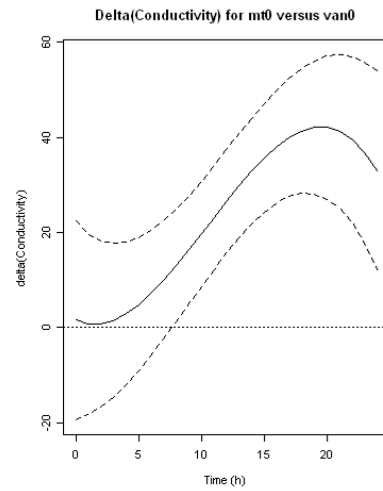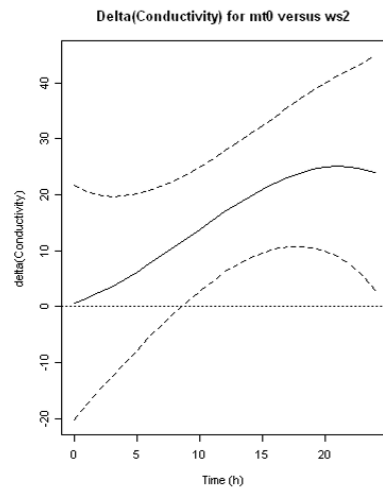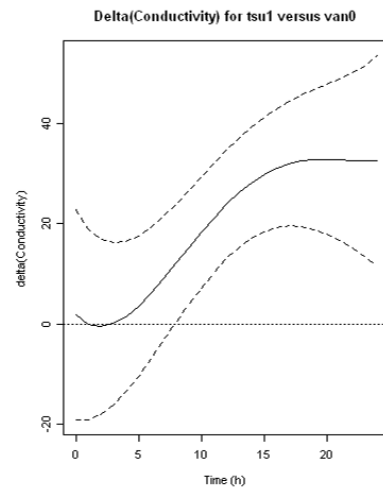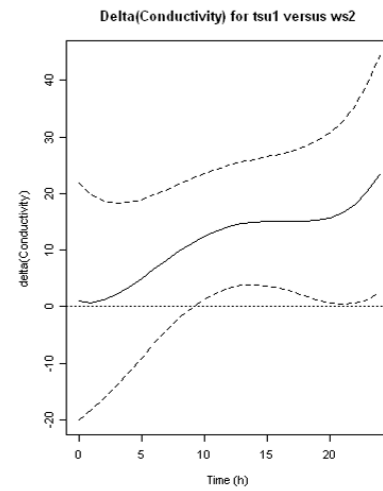

Delta(Conductivity) for van0 versus ws2

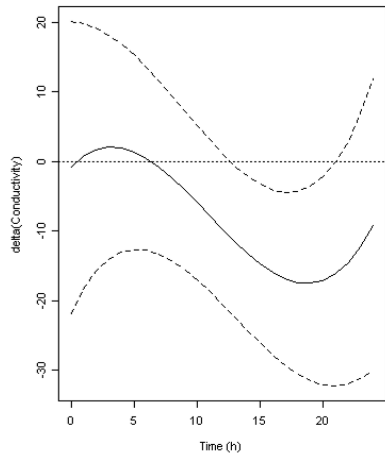

Supplemental Figure 5. Heatmap of gene expression profiles of nine selected accessions. Log<sub>2</sub>-transformed expression values of 466 genes in nine accessions 6 hours after either mock (M)- or *Pst avrRpt2* (A)-infection were clustered by average-linkage agglomerative hierarchical clustering using the Euclidean distance as a distance metric. The color key and the histogram of expression values are shown in the top left corner.

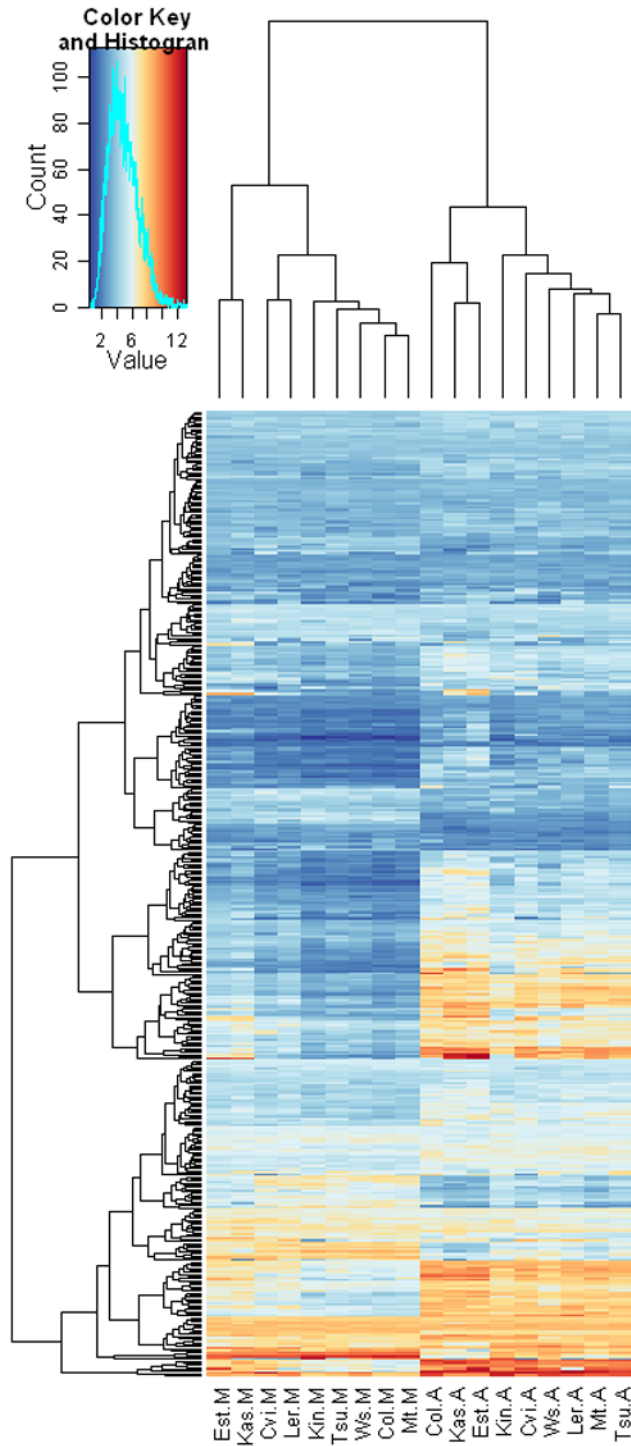

## Supplemental Table 1. Broad-sense heritabilities of the measured values

Methods: For each phenotypic characteristic or for expression of each gene, the following linear model was fitted to the data using the lmer function in the lme4 package of R.

$\text{measurement} \sim (1 | \text{genotype}) + (1 | \text{replicate})$

where genotype, replicate, and residuals are random factors.

The summary of the lmer object returns the variance for each random factor. The broad-sense heritability was calculated as the ratio of the variance for the genotype effect to the sum of the variances for all the three random factors.

For example, the broad-sense heritability for *Pst avrRpt2* growth 2 dpi was calculated as follows. “bugA2.data” is a data.frame object with the log<sub>10</sub>-transformed bacterial count data. It has total 256 observations (rows) with 11 accessions (including rps2-101C) from three independent experiments. Its first 4 rows look like:

|    | Accession | Counts   | Day | Treatment | Experiment | Plant |
|----|-----------|----------|-----|-----------|------------|-------|
| 90 | col       | 4.755875 | 2   | A         | 1          | 2     |
| 91 | col       | 4.643453 | 2   | A         | 1          | 3     |
| 92 | col       | 4.255273 | 2   | A         | 1          | 4     |
| 93 | col       | 4.012837 | 2   | A         | 1          | 5     |

The R code to fit the above model to the data is:

```
library(lme4)
lmA2 <- lmer( Counts ~ (1|Accession) + (1|Experiment), data =
bugA2.data )
```

The summary of the fitted model can be retrieved by “summary(lmA2)”:

```
Linear mixed-effects model fit by REML
Formula: Counts ~ (1 | Accession) + (1 | Experiment)
Data: bugA2.data
   AIC   BIC logLik MLdeviance REMLdeviance
586.7 597.3 -290.3      580.5      580.7
Random effects:
Groups      Name Variance Std.Dev.
Accession   1.206469 1.09839
Experiment  0.057623 0.24005
Residual    0.466416 0.68295
number of obs: 256, groups: Accession, 11; Experiment, 3

Fixed effects:
              Estimate Std. Error t value
(Intercept)   3.0672      0.3616   8.483
```

For the random factors, Accession, Experiment, and Residual, the variances of their effects are 1.206469, 0.057623, and 0.466416, respectively. So, the broad-sense heritability is  $1.206469 / (1.206469 + 0.057623 + 0.466416) = 0.6971 \sim 0.70$ .

| Broad-sense heritability in the bacterial growth data |          |          |                  |                  |                  |
|-------------------------------------------------------|----------|----------|------------------|------------------|------------------|
| Pst Day0                                              | Pst Day1 | Pst Day2 | Pst avrRpt2 Day0 | Pst avrRpt2 Day1 | Pst avrRpt2 Day2 |
| 0.05                                                  | 0.50     | 0.43     | 0.05             | 0.58             | 0.70             |

| Broad-sense heritability in the electrolyte leakage data |      |      |      |      |      |      |      |      |      |
|----------------------------------------------------------|------|------|------|------|------|------|------|------|------|
|                                                          | 0h   | 3h   | 6h   | 9h   | 12h  | 15h  | 18h  | 21h  | 24h  |
| Pst avrRpt2                                              | 0.04 | 0.23 | 0.52 | 0.64 | 0.65 | 0.62 | 0.59 | 0.56 | 0.51 |
| Pst                                                      | 0.02 | 0.14 | 0.27 | 0.36 | 0.38 | 0.37 | 0.34 | 0.33 | 0.30 |

| Broad-sense heritability in the RPS2 and actin2(control) expression levels |             |      |
|----------------------------------------------------------------------------|-------------|------|
| gene                                                                       | Pst avrRpt2 | Mock |
| actin2                                                                     | 0.09        | 0.19 |
| RPS2                                                                       | 0.19        | 0.49 |

| Broad-sense heritability in expression of each gene |      |             |
|-----------------------------------------------------|------|-------------|
| gene                                                | mock | Pst avrRpt2 |
| At1g02140                                           | 0.66 | 0.68        |
| At1g02450                                           | 0.52 | 0.37        |
| At1g03220                                           | 0.36 | 0.10        |
| At1g04410                                           | 0.56 | 0.86        |
| At1g05010                                           | 0.29 | 0.00        |
| At1g05340                                           | 0.36 | 0.79        |
| At1g05570                                           | 0.48 | 0.81        |
| At1g08050                                           | 0.25 | 0.38        |
| At1g08510                                           | 0.23 | 0.02        |
| At1g08720                                           | 0.60 | 0.24        |
| At1g08830                                           | 0.15 | 0.22        |
| At1g08930                                           | 0.54 | 0.35        |
| At1g09070                                           | 0.61 | 0.39        |
| At1g09130                                           | 0.33 | 0.34        |
| At1g09200                                           | 0.30 | 0.28        |
| At1g09500                                           | 0.13 | 0.66        |
| At1g09970                                           | 0.48 | 0.21        |
| At1g10070                                           | 0.44 | 0.78        |
| At1g10585                                           | 0.36 | 0.26        |
| At1g10950                                           | 0.40 | 0.17        |
| At1g11050                                           | 0.00 | 0.00        |
| At1g11260                                           | 0.47 | 0.67        |
| At1g11310                                           | 0.46 | 0.66        |
| At1g11580                                           | 0.79 | 0.73        |
| At1g11650                                           | 0.63 | 0.45        |

|           |      |      |
|-----------|------|------|
| At1g12110 | 0.26 | 0.80 |
| At1g12240 | 0.85 | 0.74 |
| At1g12520 | 0.55 | 0.63 |
| At1g13320 | 0.75 | 0.60 |
| At1g14870 | 0.62 | 0.65 |
| At1g14980 | 0.51 | 0.36 |
| At1g15210 | 0.14 | 0.00 |
| At1g15670 | 0.67 | 0.47 |
| At1g17020 | 0.01 | 0.53 |
| At1g17420 | 0.00 | 0.21 |
| At1g19150 | 0.86 | 0.58 |
| At1g19250 | 0.80 | 0.89 |
| At1g19670 | 0.37 | 0.64 |
| At1g20440 | 0.46 | 0.50 |
| At1g21240 | 0.69 | 0.18 |
| At1g21250 | 0.71 | 0.12 |
| At1g21750 | 0.48 | 0.11 |
| At1g23040 | 0.59 | 0.74 |
| At1g24100 | 0.34 | 0.47 |
| At1g25490 | 0.84 | 0.75 |
| At1g26380 | 0.23 | 0.51 |
| At1g27100 | 0.05 | 0.19 |
| At1g27130 | 0.54 | 0.27 |
| At1g27730 | 0.28 | 0.03 |
| At1g28480 | 0.56 | 0.47 |
| At1g30040 | 0.00 | 0.45 |
| At1g30400 | 0.37 | 0.65 |
| At1g32210 | 0.22 | 0.50 |
| At1g33960 | 0.65 | 0.97 |
| At1g35230 | 0.77 | 0.93 |
| At1g43160 | 0.00 | 0.70 |
| At1g44350 | 0.39 | 0.24 |
| At1g45145 | 0.62 | 0.65 |
| At1g47830 | 0.34 | 0.14 |
| At1g51660 | 0.54 | 0.12 |
| At1g51680 | 0.35 | 0.15 |
| At1g53840 | 0.18 | 0.54 |
| At1g54010 | 0.68 | 0.66 |
| At1g59870 | 0.43 | 0.51 |
| At1g61560 | 0.40 | 0.29 |
| At1g62300 | 0.45 | 0.19 |
| At1g62570 | 0.68 | 0.89 |
| At1g62660 | 0.62 | 0.59 |
| At1g64710 | 0.26 | 0.52 |
| At1g64980 | 0.50 | 0.67 |

|           |      |      |
|-----------|------|------|
| At1g65500 | 0.47 | 0.77 |
| At1g66340 | 0.26 | 0.00 |
| At1g67350 | 0.22 | 0.39 |
| At1g67360 | 0.54 | 0.35 |
| At1g68620 | 0.71 | 0.85 |
| At1g68840 | 0.56 | 0.17 |
| At1g69490 | 0.00 | 0.65 |
| At1g70410 | 0.50 | 0.55 |
| At1g71030 | 0.22 | 0.39 |
| At1g71880 | 0.53 | 0.67 |
| At1g72610 | 0.42 | 0.75 |
| At1g72710 | 0.17 | 0.53 |
| At1g72930 | 0.88 | 0.85 |
| At1g74020 | 0.46 | 0.49 |
| At1g74710 | 0.62 | 0.70 |
| At1g75040 | 0.74 | 0.86 |
| At1g75950 | 0.43 | 0.22 |
| At1g76490 | 0.42 | 0.18 |
| At1g76960 | 0.45 | 0.47 |
| At1g77510 | 0.33 | 0.74 |
| At1g77760 | 0.30 | 0.43 |
| At1g78080 | 0.40 | 0.00 |
| At1g78670 | 0.74 | 0.60 |
| At1g78900 | 0.32 | 0.23 |
| At1g79550 | 0.37 | 0.71 |
| At1g80040 | 0.36 | 0.21 |
| At1g80460 | 0.60 | 0.45 |
| At1g80830 | 0.46 | 0.40 |
| At1g80840 | 0.00 | 0.67 |
| At2g01450 | 0.00 | 0.36 |
| At2g01970 | 0.22 | 0.06 |
| At2g02100 | 0.77 | 0.65 |
| At2g02930 | 0.66 | 0.59 |
| At2g02990 | 0.29 | 0.51 |
| At2g03680 | 0.27 | 0.60 |
| At2g03760 | 0.67 | 0.87 |
| At2g04160 | 0.66 | 0.57 |
| At2g04400 | 0.80 | 0.89 |
| At2g04700 | 0.64 | 0.72 |
| At2g05940 | 0.59 | 0.80 |
| At2g06050 | 0.52 | 0.26 |
| At2g06850 | 0.79 | 0.35 |
| At2g13810 | 0.13 | 0.63 |
| At2g14560 | 0.46 | 0.27 |
| At2g14610 | 0.87 | 0.90 |



|           |      |      |
|-----------|------|------|
| At2g14620 | 0.00 | 0.68 |
| At2g15390 | 0.56 | 0.40 |
| At2g15970 | 0.81 | 0.79 |
| At2g16510 | 0.46 | 0.15 |
| At2g17120 | 0.58 | 0.59 |
| At2g17450 | 0.73 | 0.60 |
| At2g17500 | 0.51 | 0.77 |
| At2g18210 | 0.93 | 0.84 |
| At2g18660 | 0.79 | 0.86 |
| At2g18680 | 0.54 | 0.39 |
| At2g18690 | 0.00 | 0.53 |
| At2g18960 | 0.12 | 0.09 |
| At2g19190 | 0.44 | 0.57 |
| At2g19310 | 0.92 | 0.94 |
| At2g19790 | 0.46 | 0.66 |
| At2g20790 | 0.49 | 0.38 |
| At2g21660 | 0.15 | 0.64 |
| At2g22330 | 0.80 | 0.68 |
| At2g22500 | 0.25 | 0.53 |
| At2g22690 | 0.18 | 0.12 |
| At2g22860 | 0.01 | 0.00 |
| At2g23090 | 0.01 | 0.17 |
| At2g23450 | 0.27 | 0.21 |
| At2g24200 | 0.30 | 0.00 |
| At2g25110 | 0.27 | 0.22 |
| At2g25450 | 0.96 | 0.96 |
| At2g25670 | 0.06 | 0.21 |
| At2g25900 | 0.53 | 0.62 |
| At2g26690 | 0.84 | 0.66 |
| At2g27860 | 0.40 | 0.21 |
| At2g28190 | 0.12 | 0.10 |
| At2g28210 | 0.00 | 0.83 |
| At2g28400 | 0.36 | 0.49 |
| At2g28510 | 0.11 | 0.12 |
| At2g28910 | 0.68 | 0.63 |
| At2g29080 | 0.12 | 0.09 |
| At2g29350 | 0.76 | 0.91 |
| At2g29420 | 0.49 | 0.38 |
| At2g29450 | 0.65 | 0.51 |
| At2g29460 | 0.48 | 0.84 |
| At2g29500 | 0.74 | 0.93 |
| At2g29720 | 0.00 | 0.00 |
| At2g29980 | 0.30 | 0.53 |
| At2g30250 | 0.48 | 0.49 |
| At2g30490 | 0.01 | 0.16 |

|           |      |      |
|-----------|------|------|
| At2g30550 | 0.55 | 0.68 |
| At2g30770 | 0.73 | 0.92 |
| At2g30930 | 0.59 | 0.55 |
| At2g31400 | 0.44 | 0.62 |
| At2g31890 | 0.49 | 0.42 |
| At2g32150 | 0.51 | 0.70 |
| At2g33150 | 0.21 | 0.05 |
| At2g33220 | 0.74 | 0.75 |
| At2g33380 | 0.48 | 0.64 |
| At2g33830 | 0.59 | 0.35 |
| At2g34250 | 0.48 | 0.00 |
| At2g34810 | 0.60 | 0.52 |
| At2g36530 | 0.33 | 0.40 |
| At2g36690 | 0.11 | 0.50 |
| At2g36880 | 0.38 | 0.54 |
| At2g36950 | 0.69 | 0.43 |
| At2g37040 | 0.56 | 0.13 |
| At2g37130 | 0.69 | 0.84 |
| At2g37190 | 0.58 | 0.41 |
| At2g37760 | 0.74 | 0.78 |
| At2g37970 | 0.30 | 0.53 |
| At2g38210 | 0.37 | 0.66 |
| At2g38470 | 0.43 | 0.16 |
| At2g38530 | 0.47 | 0.74 |
| At2g38540 | 0.38 | 0.67 |
| At2g38870 | 0.09 | 0.43 |
| At2g39200 | 0.14 | 0.33 |
| At2g39710 | 0.06 | 0.53 |
| At2g39980 | 0.52 | 0.37 |
| At2g40000 | 0.69 | 0.51 |
| At2g40140 | 0.45 | 0.23 |
| At2g40750 | 0.76 | 0.84 |
| At2g41090 | 0.48 | 0.54 |
| At2g41180 | 0.45 | 0.80 |
| At2g41410 | 0.40 | 0.54 |
| At2g41940 | 0.25 | 0.08 |
| At2g42360 | 0.46 | 0.50 |
| At2g43290 | 0.42 | 0.06 |
| At2g43510 | 0.42 | 0.29 |
| At2g43570 | 0.80 | 0.86 |
| At2g43620 | 0.25 | 0.93 |
| At2g43710 | 0.42 | 0.52 |
| At2g43945 | 0.65 | 0.47 |
| At2g44490 | 0.31 | 0.26 |
| At2g45170 | 0.12 | 0.33 |

|           |      |      |
|-----------|------|------|
| At2g45570 | 0.00 | 0.45 |
| At2g45760 | 0.54 | 0.63 |
| At2g46170 | 0.61 | 0.33 |
| At2g46650 | 0.31 | 0.16 |
| At2g46680 | 0.26 | 0.45 |
| At2g47170 | 0.37 | 0.25 |
| At2g47180 | 0.00 | 0.06 |
| At2g47470 | 0.54 | 0.54 |
| At2g47800 | 0.39 | 0.87 |
| At3g01150 | 0.67 | 0.47 |
| At3g02450 | 0.56 | 0.34 |
| At3g02520 | 0.12 | 0.32 |
| At3g02875 | 0.58 | 0.50 |
| At3g04720 | 0.79 | 0.68 |
| At3g04940 | 0.79 | 0.53 |
| At3g05200 | 0.48 | 0.56 |
| At3g09010 | 0.32 | 0.56 |
| At3g09440 | 0.13 | 0.51 |
| At3g10520 | 0.49 | 0.74 |
| At3g11020 | 0.55 | 0.41 |
| At3g11340 | 0.41 | 0.74 |
| At3g11410 | 0.44 | 0.64 |
| At3g11820 | 0.51 | 0.70 |
| At3g12390 | 0.60 | 0.51 |
| At3g12580 | 0.20 | 0.68 |
| At3g13460 | 0.73 | 0.52 |
| At3g13790 | 0.50 | 0.49 |
| At3g13950 | 0.71 | 0.61 |
| At3g15210 | 0.12 | 0.48 |
| At3g16370 | 0.75 | 0.64 |
| At3g16470 | 0.55 | 0.68 |
| At3g16770 | 0.72 | 0.48 |
| At3g16860 | 0.23 | 0.38 |
| At3g18050 | 0.50 | 0.08 |
| At3g19760 | 0.58 | 0.27 |
| At3g19930 | 0.29 | 0.54 |
| At3g20970 | 0.69 | 0.10 |
| At3g22170 | 0.39 | 0.10 |
| At3g22370 | 0.07 | 0.20 |
| At3g22440 | 0.06 | 0.39 |
| At3g23030 | 0.86 | 0.76 |
| At3g23050 | 0.71 | 0.79 |
| At3g23120 | 0.14 | 0.52 |
| At3g25010 | 0.81 | 0.91 |
| At3g25250 | 0.03 | 0.64 |

|           |      |      |
|-----------|------|------|
| At3g26740 | 0.38 | 0.42 |
| At3g26830 | 0.65 | 0.80 |
| At3g27690 | 0.67 | 0.58 |
| At3g28210 | 0.00 | 0.71 |
| At3g28270 | 0.88 | 0.39 |
| At3g28510 | 0.35 | 0.88 |
| At3g28540 | 0.91 | 0.72 |
| At3g28930 | 0.33 | 0.34 |
| At3g30775 | 0.46 | 0.46 |
| At3g44880 | 0.66 | 0.54 |
| At3g46820 | 0.64 | 0.39 |
| At3g47960 | 0.36 | 0.25 |
| At3g48070 | 0.22 | 0.55 |
| At3g48090 | 0.20 | 0.64 |
| At3g48890 | 0.79 | 0.88 |
| At3g49120 | 0.71 | 0.89 |
| At3g50060 | 0.14 | 0.41 |
| At3g50970 | 0.60 | 0.88 |
| At3g51330 | 0.76 | 0.41 |
| At3g51370 | 0.08 | 0.04 |
| At3g51730 | 0.20 | 0.40 |
| At3g51860 | 0.87 | 0.80 |
| At3g51895 | 0.74 | 0.36 |
| At3g52400 | 0.58 | 0.50 |
| At3g52430 | 0.49 | 0.80 |
| At3g53110 | 0.40 | 0.63 |
| At3g54150 | 0.12 | 0.55 |
| At3g54420 | 0.60 | 0.51 |
| At3g54480 | 0.23 | 0.08 |
| At3g54840 | 0.40 | 0.15 |
| At3g54860 | 0.61 | 0.19 |
| At3g54920 | 0.65 | 0.58 |
| At3g56400 | 0.74 | 0.39 |
| At3g57020 | 0.37 | 0.35 |
| At3g57240 | 0.74 | 0.47 |
| At3g57260 | 0.90 | 0.89 |
| At3g61440 | 0.22 | 0.70 |
| At4g00110 | 0.66 | 0.71 |
| At4g00430 | 0.92 | 0.78 |
| At4g00700 | 0.62 | 0.61 |
| At4g01100 | 0.54 | 0.60 |
| At4g01370 | 0.27 | 0.03 |
| At4g01700 | 0.29 | 0.32 |
| At4g02080 | 0.29 | 0.35 |
| At4g02330 | 0.49 | 0.73 |

|           |      |      |
|-----------|------|------|
| At4g02380 | 0.65 | 0.33 |
| At4g02580 | 0.78 | 0.76 |
| At4g03520 | 0.69 | 0.79 |
| At4g03550 | 0.11 | 0.06 |
| At4g04210 | 0.44 | 0.54 |
| At4g04490 | 0.55 | 0.22 |
| At4g04610 | 0.71 | 0.62 |
| At4g08870 | 0.56 | 0.83 |
| At4g10500 | 0.84 | 0.93 |
| At4g10840 | 0.46 | 0.67 |
| At4g11110 | 0.62 | 0.19 |
| At4g11360 | 0.37 | 0.47 |
| At4g11840 | 0.29 | 0.49 |
| At4g12470 | 0.66 | 0.50 |
| At4g12480 | 0.65 | 0.38 |
| At4g13250 | 0.56 | 0.61 |
| At4g13510 | 0.55 | 0.33 |
| At4g13770 | 0.76 | 0.78 |
| At4g13790 | 0.00 | 0.19 |
| At4g13830 | 0.84 | 0.66 |
| At4g14340 | 0.68 | 0.76 |
| At4g14365 | 0.66 | 0.33 |
| At4g14400 | 0.89 | 0.91 |
| At4g15475 | 0.33 | 0.59 |
| At4g15490 | 0.38 | 0.70 |
| At4g15550 | 0.46 | 0.74 |
| At4g15610 | 0.45 | 0.40 |
| At4g16890 | 0.92 | 0.87 |
| At4g17500 | 0.34 | 0.61 |
| At4g17550 | 0.68 | 0.71 |
| At4g18800 | 0.44 | 0.72 |
| At4g19040 | 0.80 | 0.84 |
| At4g20110 | 0.70 | 0.66 |
| At4g20150 | 0.03 | 0.35 |
| At4g20780 | 0.50 | 0.42 |
| At4g21160 | 0.52 | 0.49 |
| At4g21830 | 0.10 | 0.61 |
| At4g22470 | 0.07 | 0.35 |
| At4g22750 | 0.09 | 0.01 |
| At4g22920 | 0.28 | 0.64 |
| At4g23100 | 0.83 | 0.64 |
| At4g23150 | 0.84 | 0.97 |
| At4g23180 | 0.51 | 0.25 |
| At4g23400 | 0.53 | 0.49 |
| At4g23550 | 0.31 | 0.29 |

|           |      |      |
|-----------|------|------|
| At4g23600 | 0.83 | 0.87 |
| At4g23810 | 0.46 | 0.59 |
| At4g24290 | 0.47 | 0.30 |
| At4g24340 | 0.49 | 0.77 |
| At4g24350 | 0.57 | 0.49 |
| At4g24370 | 0.48 | 0.43 |
| At4g25030 | 0.09 | 0.26 |
| At4g25130 | 0.65 | 0.76 |
| At4g25200 | 0.21 | 0.54 |
| At4g25480 | 0.84 | 0.49 |
| At4g25630 | 0.72 | 0.52 |
| At4g25900 | 0.57 | 0.18 |
| At4g26400 | 0.31 | 0.61 |
| At4g26410 | 0.69 | 0.23 |
| At4g27070 | 0.84 | 0.86 |
| At4g27280 | 0.27 | 0.42 |
| At4g27410 | 0.06 | 0.44 |
| At4g30210 | 0.67 | 0.45 |
| At4g31500 | 0.56 | 0.43 |
| At4g31720 | 0.76 | 0.02 |
| At4g31800 | 0.64 | 0.17 |
| At4g32530 | 0.39 | 0.36 |
| At4g32930 | 0.51 | 0.70 |
| At4g33050 | 0.59 | 0.08 |
| At4g33540 | 0.58 | 0.79 |
| At4g34200 | 0.30 | 0.45 |
| At4g34230 | 0.42 | 0.49 |
| At4g34700 | 0.88 | 0.79 |
| At4g35180 | 0.45 | 0.30 |
| At4g35260 | 0.76 | 0.47 |
| At4g35770 | 0.06 | 0.35 |
| At4g36040 | 0.13 | 0.29 |
| At4g36220 | 0.30 | 0.33 |
| At4g36670 | 0.47 | 0.71 |
| At4g36690 | 0.33 | 0.16 |
| At4g36990 | 0.68 | 0.68 |
| At4g37000 | 0.84 | 0.77 |
| At4g37310 | 0.50 | 0.35 |
| At4g37370 | 0.23 | 0.84 |
| At4g37450 | 0.39 | 0.47 |
| At4g37470 | 0.58 | 0.65 |
| At4g37800 | 0.59 | 0.39 |
| At4g37830 | 0.52 | 0.52 |
| At4g37990 | 0.10 | 0.63 |
| At4g38060 | 0.31 | 0.32 |

|           |      |      |
|-----------|------|------|
| At4g38250 | 0.00 | 0.00 |
| At4g38540 | 0.37 | 0.23 |
| At4g38920 | 0.43 | 0.65 |
| At4g39030 | 0.60 | 0.44 |
| At4g39330 | 0.65 | 0.59 |
| At4g39640 | 0.67 | 0.16 |
| At4g39670 | 0.58 | 0.70 |
| At4g39830 | 0.59 | 0.70 |
| At4g39950 | 0.49 | 0.58 |
| At4g40030 | 0.41 | 0.30 |
| At5g01600 | 0.15 | 0.00 |
| At5g01820 | 0.10 | 0.32 |
| At5g02120 | 0.69 | 0.71 |
| At5g02490 | 0.45 | 0.67 |
| At5g04340 | 0.46 | 0.14 |
| At5g04590 | 0.21 | 0.24 |
| At5g05010 | 0.49 | 0.73 |
| At5g06320 | 0.40 | 0.63 |
| At5g06860 | 0.34 | 0.33 |
| At5g06870 | 0.41 | 0.28 |
| At5g07440 | 0.19 | 0.23 |
| At5g08240 | 0.24 | 0.34 |
| At5g12030 | 0.19 | 0.62 |
| At5g12250 | 0.64 | 0.58 |
| At5g13320 | 0.51 | 0.59 |
| At5g13490 | 0.34 | 0.32 |
| At5g13930 | 0.57 | 0.61 |
| At5g14060 | 0.71 | 0.18 |
| At5g15350 | 0.48 | 0.69 |
| At5g15410 | 0.61 | 0.74 |
| At5g15610 | 0.93 | 0.94 |
| At5g16080 | 0.32 | 0.43 |
| At5g20230 | 0.33 | 0.14 |
| At5g21105 | 0.78 | 0.54 |
| At5g22300 | 0.46 | 0.57 |
| At5g22570 | 0.49 | 0.57 |
| At5g24150 | 0.63 | 0.50 |
| At5g24160 | 0.76 | 0.80 |
| At5g24780 | 0.66 | 0.76 |
| At5g25610 | 0.23 | 0.26 |
| At5g26920 | 0.79 | 0.64 |
| At5g27380 | 0.81 | 0.84 |
| At5g28040 | 0.36 | 0.00 |
| At5g28540 | 0.58 | 0.56 |
| At5g38470 | 0.02 | 0.28 |

|           |      |      |
|-----------|------|------|
| At5g39670 | 0.42 | 0.26 |
| At5g41950 | 0.93 | 0.90 |
| At5g42650 | 0.57 | 0.77 |
| At5g42790 | 0.45 | 0.30 |
| At5g43320 | 0.67 | 0.57 |
| At5g43940 | 0.68 | 0.63 |
| At5g44070 | 0.62 | 0.33 |
| At5g44420 | 0.74 | 0.78 |
| At5g46050 | 0.68 | 0.46 |
| At5g47120 | 0.55 | 0.32 |
| At5g47220 | 0.43 | 0.43 |
| At5g47230 | 0.48 | 0.20 |
| At5g48570 | 0.22 | 0.80 |
| At5g50200 | 0.40 | 0.00 |
| At5g52310 | 0.44 | 0.52 |
| At5g52510 | 0.23 | 0.59 |
| At5g52640 | 0.00 | 0.77 |
| At5g52760 | 0.62 | 0.73 |
| At5g54250 | 0.64 | 0.27 |
| At5g54810 | 0.41 | 0.47 |
| At5g57220 | 0.16 | 0.29 |
| At5g58290 | 0.00 | 0.69 |
| At5g58670 | 0.46 | 0.17 |
| At5g60390 | 0.35 | 0.38 |
| At5g60800 | 0.43 | 0.68 |
| At5g60850 | 0.17 | 0.60 |
| At5g61790 | 0.33 | 0.00 |
| At5g63400 | 0.32 | 0.64 |
| At5g64000 | 0.55 | 0.03 |
| At5g64120 | 0.12 | 0.32 |
| At5g65360 | 0.26 | 0.17 |
| At5g65730 | 0.59 | 0.30 |
| At5g66055 | 0.83 | 0.81 |
| At5g66510 | 0.11 | 0.18 |
| At5g66760 | 0.33 | 0.11 |
| At5g67310 | 0.09 | 0.92 |
|           |      |      |
| average   | 0.46 | 0.49 |



Supplemental Table 2. Genes in gene-clusters.

| Cluster # | Genes in cluster                                                                                                                                                                                                                                                                                                                         |
|-----------|------------------------------------------------------------------------------------------------------------------------------------------------------------------------------------------------------------------------------------------------------------------------------------------------------------------------------------------|
| c2        | At4g24290, At4g34200, At2g30250, At3g28210, At1g19150, At2g21660, At2g43710, At1g72610, At5g06860, At4g37370                                                                                                                                                                                                                             |
| c3        | At1g10585, At2g04400, At3g27690                                                                                                                                                                                                                                                                                                          |
| c4        | At4g37000, At5g47120, At4g37470                                                                                                                                                                                                                                                                                                          |
| c5        | At4g11840, At5g02120, At1g26380, At2g02930, At2g38540, At3g26830, At1g21240, At5g07440, At2g45570, At1g14870, At2g17500, At4g25900, At4g25030, At5g22300, At4g32930, At2g15970, At3g09010, At5g42650, At4g23600, At1g20440, At3g16370, At5g54810, At2g28210, At4g38540, At5g43320, At2g13810, At2g14620, At5g25610, At5g52310, At4g39330 |
| c7        | At3g25250, At5g16080, At4g36990, At3g51895, At5g28040                                                                                                                                                                                                                                                                                    |
| c8        | At3g09440, At3g12580, At1g79550, At5g52640                                                                                                                                                                                                                                                                                               |
| c10       | At5g02490, At5g58290, At3g04940                                                                                                                                                                                                                                                                                                          |
| c14       | At1g80830, At4g23810, At3g13790, At4g15490                                                                                                                                                                                                                                                                                               |
| c15       | At1g15670, At4g36690, At5g66055, At4g15610                                                                                                                                                                                                                                                                                               |
| c16       | At3g02875, At4g23150, At3g26740                                                                                                                                                                                                                                                                                                          |
| c17       | At1g08830, At5g20230, At3g13950, At4g30210                                                                                                                                                                                                                                                                                               |
| c18       | At3g49120, At4g39670, At4g34700, At3g10520                                                                                                                                                                                                                                                                                               |
| c19       | At2g18680, At4g03520, At1g74020, At4g11360, At4g20780                                                                                                                                                                                                                                                                                    |
| c21       | At3g11820, At5g06320, At1g64710                                                                                                                                                                                                                                                                                                          |
| c23       | At1g30400, At3g51370, At4g02580                                                                                                                                                                                                                                                                                                          |
| c25       | At2g14610, At5g58670, At1g71880                                                                                                                                                                                                                                                                                                          |
| c28       | At2g30770, At4g35770, At1g68620, At1g69490, At2g43620, At2g43570                                                                                                                                                                                                                                                                         |
| c29       | At1g45145, At2g47800, At1g11260, At3g12390, At5g15410, At4g13770                                                                                                                                                                                                                                                                         |
| c31       | At1g19670, At5g60850, At2g19190, At4g13250                                                                                                                                                                                                                                                                                               |
| c32       | At2g22690, At2g37970, At1g19250, At2g45170, At3g54150, At5g12250                                                                                                                                                                                                                                                                         |
| c33       | At2g41180, At4g36040, At4g37990                                                                                                                                                                                                                                                                                                          |
| c34       | At2g38470, At4g02080, At2g43290, At1g62300                                                                                                                                                                                                                                                                                               |
| c35       | At2g38530, At2g43945, At5g12030, At2g40000                                                                                                                                                                                                                                                                                               |
| c36       | At2g45760, At4g38920, At2g28400, At1g30040                                                                                                                                                                                                                                                                                               |
| c37       | At3g04720, At5g08240, At2g29350, At1g10070, At2g43510                                                                                                                                                                                                                                                                                    |
| c39       | At1g12520, At5g43940, At1g25490                                                                                                                                                                                                                                                                                                          |
| c42       | At2g15390, At5g64000, At2g33830, At4g10500, At3g57260                                                                                                                                                                                                                                                                                    |
| c50       | At2g36950, At3g28930, At4g08870, At1g61560                                                                                                                                                                                                                                                                                               |
| c29m      | At2g47800, At4g39330, At4g39950                                                                                                                                                                                                                                                                                                          |

Note: Clusters shown are from gene-expression profiles 6h after inoculation with *Pst avrRpt2*, except cluster c29m which was the only cluster from gene-expression profiles 6h after mock-inoculation that showed significant correlation with any of the phenotypic data

**Supplemental table 3.** Primers used for sequencing *RPS2*

| Fragment | primer 1                             | primer 2             |
|----------|--------------------------------------|----------------------|
| 1        | ATTTTGTTATCGGGCCTTCACTG <sup>1</sup> | TCATCGTGGTATTTCCGACA |
| 2        | GCCGACTACAACTGTGCAA                  | ATCAACGCTAGTGGCAATCC |
| 3        | CAACAATATGGGTGCGGAAT                 | GCTGTTCTGTTGGAGCATCA |
| 4        | CAACAATATGGGTGCGGAAT                 | TCTTCAACGTGGAGATGCTG |
| 5        | ACTACAGTTACGCCGTTGG                  | GGTCCTCCTCTCCTGAAAC  |
| 6        | AAGCGAACACGAGAGTCCAT                 | GGATCCGGTTCAGCTCATTA |

<sup>1</sup> Primers in red used for sequencing the fragments amplified using both primers

**Supplemental table 4.** Primers used for qRT-PCR

| Gene               | primer 1             | primer 2              |
|--------------------|----------------------|-----------------------|
| Actin2 (At3g18780) | AGTGTCTGGATCGGTGGTTC | CCCCAGCTTTTTTAAGCCTTT |
| RPS2 (At4g26090)   | GGCGGAGAGAAGAGGACATA | CAGCTTCGTCCCTCTAGACC  |
